# Supplementary material for: Solvothermal synthesis and characterization of thioindate–thioantimonates with transition-metal complexes: The first examples of the incorporation of transition metal ions into In–S–Sb frameworks
Source: Royal Society of Chemistry journal article supplement (doi:10.1039/c2dt32132g), 2012-10-25
Supplement: c2dt32132g.pdf [file c2dt32132g.pdf]

Supporting Information for

**Solvothermal synthesis and characterization of thioindate-thioantimonates with transition-metal complexes: the first examples of the incorporation of transition metal ions into In-S-Sb framework**

Jian Zhou, Xing Liu, Litao An, Feilong Hu, Yuhe Kan, Rong Li, and Zhenming Shen

Table S1 Some important bond lengths (Å) and angles (°) for **1-3**.

| <b>1</b> |                       |         |                       |
|----------|-----------------------|---------|-----------------------|
| Sb1-S    | 2.454(5)-2.460(5)     | Sb2-S   | 2.417(5)-2.447(5)     |
| In1-S    | 2.445(5)-2.492(5)     | In2-S   | 2.422(4)-2.491(5)     |
| Ni1-N    | 2.03(15)-2.17(5)      | S-Sb1-S | 94.76(18)-96.66(18)   |
| S3-Sb2-S | 91.31(18)-100.8(2)    | S-In1-S | 105.20(19)-113.78(18) |
| S-In2-S  | 103.14(18)-117.29(17) | N-Ni1-N | 77.4(10)-172.6(9)     |
| <b>2</b> |                       |         |                       |
| Sb1-S    | 2.4212(17)-2.4288(18) | Sb2-S   | 2.4263(19)-2.4638(19) |
| Sb3-S    | 2.4311(19)-2.447(2)   | In1-S   | 2.4212(19)-2.4942(19) |
| In2-S    | 2.4379(19)-2.470(2)   | In3-S   | 2.4328(17)-2.4721(19) |
| Ni1-N    | 2.188(7)-2.217(6)     | Ni2-N   | 2.155(14)-2.29(2)     |
| S-Sb1-S  | 92.75(6)-98.89(7)     | S-Sb2-S | 91.26(7)-95.92(7)     |
| S-Sb3-S  | 90.87(7)-101.22(8)    | S-In1-S | 101.85(6)-123.84(7)   |
| S-In2-S  | 103.41(7)-114.16(7)   | S-In3-S | 107.09(7)-112.56(6)   |
| N-Ni1-N  | 77.5(3)-168.4(3)      | N-Ni2-N | 79.1(9)-173.4(6)      |
| <b>3</b> |                       |         |                       |
| Sb1-S    | 2.413(6)-2.435(6)     | In1-S   | 2.463(6)-2.484(7)     |
| Co1-N    | 2.07(2)- 2.21(2)      | Co1-S   | 2.318(6)              |
| S-Sb1-S  | 90.6(2)- 99.5(2)      | S-In1-S | 97.68(18)-119.5(2)    |
| N-Co1-N  | 78.0(8)-130.0(9)      | N-Co1-S | 95.5(5)-173.7(5)      |

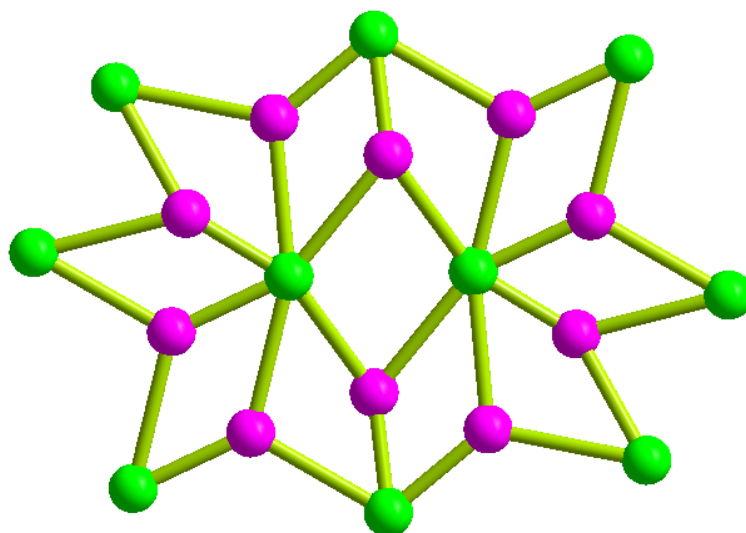

Figure S1 Topology of the  $[\text{In}_2\text{Sb}_2\text{S}_7]^{2n-}_n$  layer in **1** (green/pink:  $[\text{In}_2\text{S}_7]/[\text{SbS}_3]$  nodes).

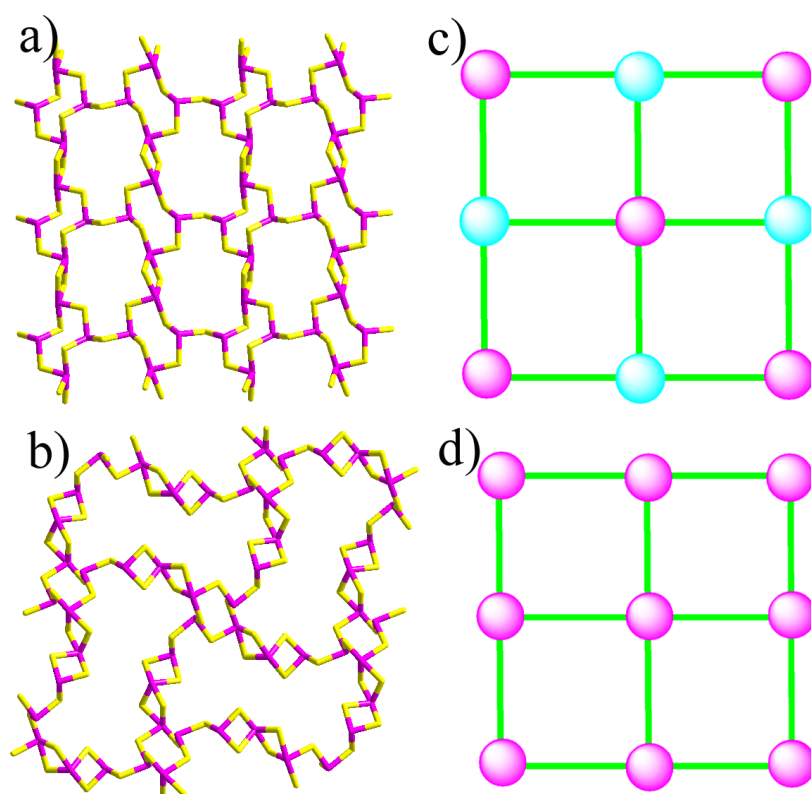

Figure S2 View of 2-D  $[\text{Sb}_4\text{S}_7]^{2n-}_n$  layers (a,b). Topology of the  $[\text{Sb}_4\text{S}_7]^{2n-}_n$  layers (c, blue/pink:  $[\text{Sb}_2\text{S}_5]/[\text{Sb}_2\text{S}_6]$  nodes; d, pink:  $[\text{Sb}_4\text{S}_9]$  nodes).

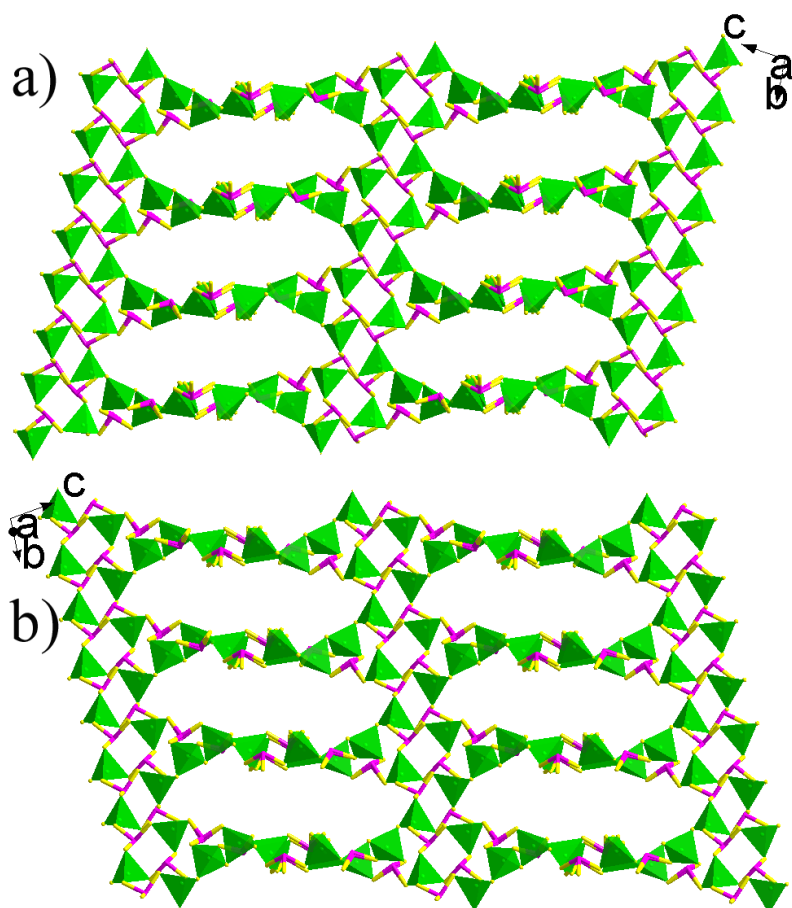

Figure S3 View of 3-D In-S-Sb open-framework in **2** along  $[1\bar{1}0]$  and  $[1\bar{1}0]$ .

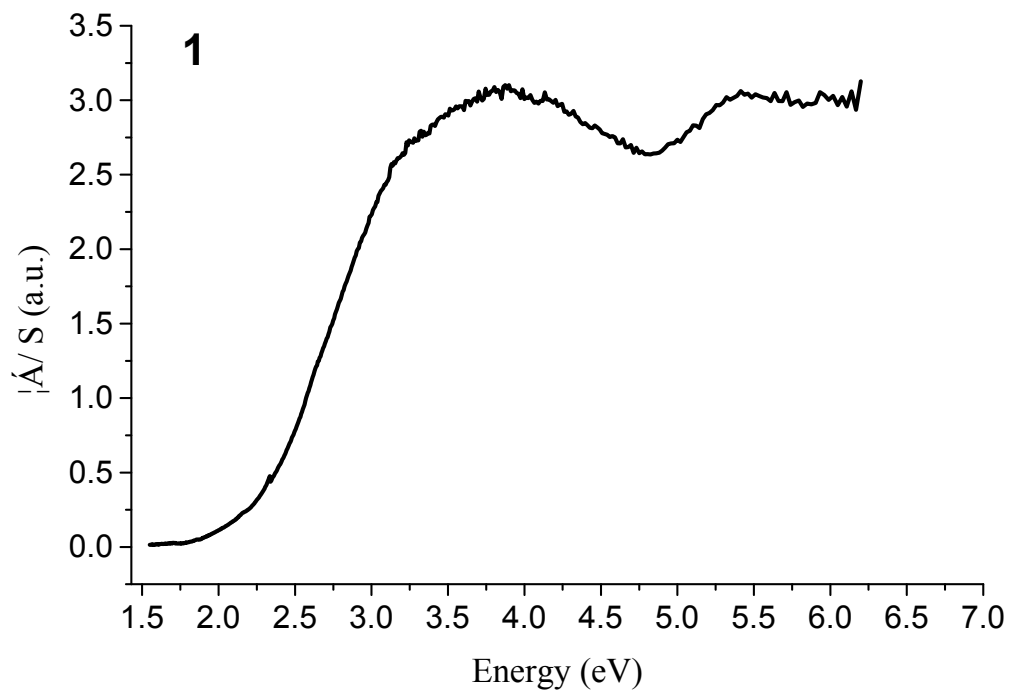

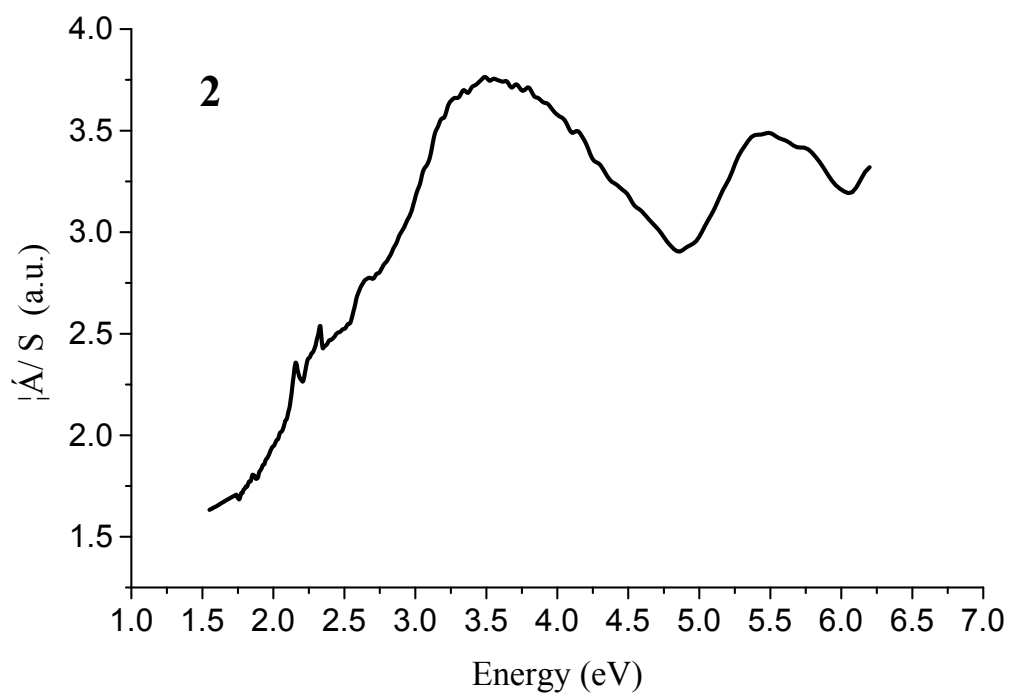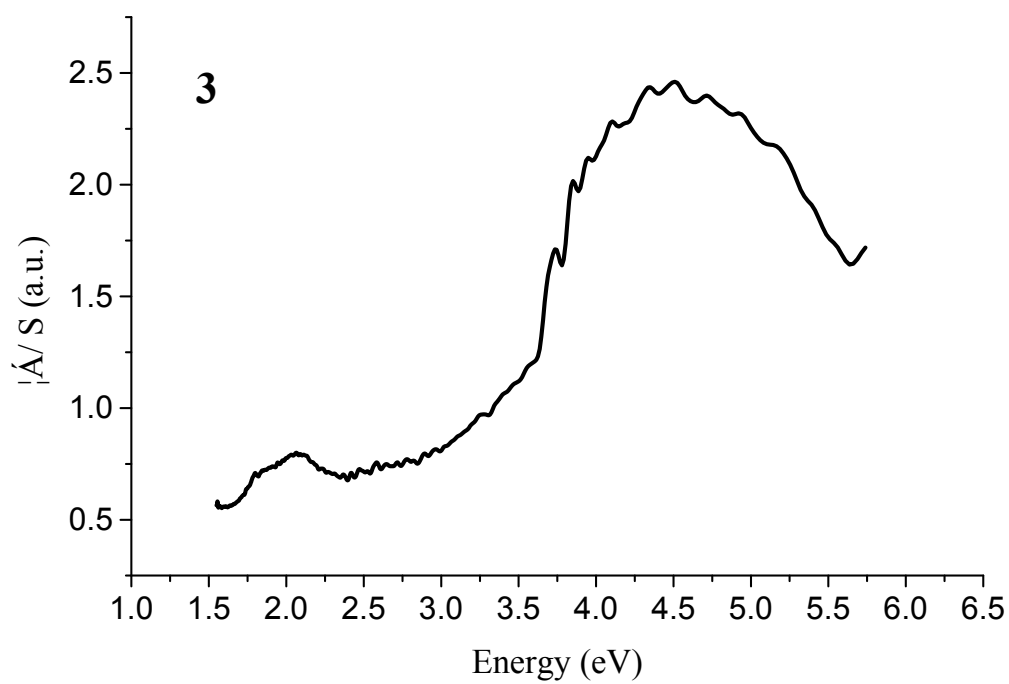

Figure S4 The solid-state UV/Vis absorption spectra of **1-3**.

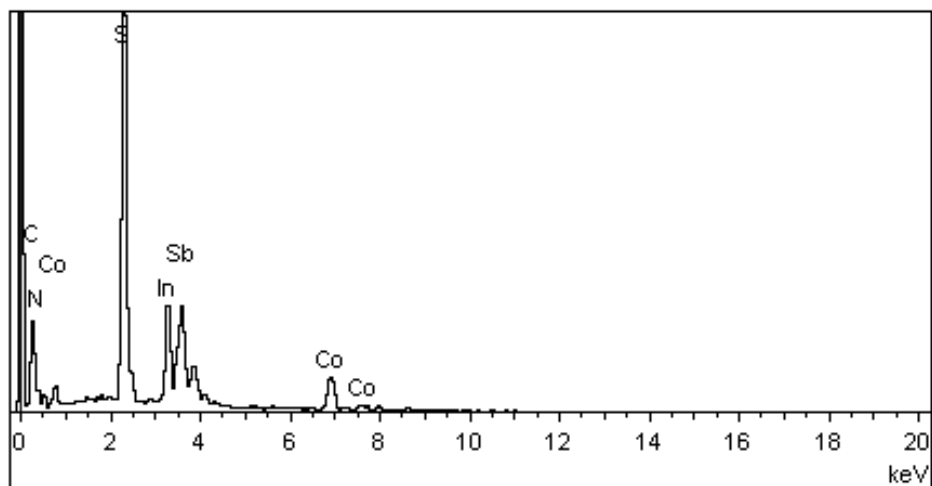

Figure S5 EDS spectrum of **3**.

The energy dispersive spectroscopy (EDS) analyses show that molar ratios of In:Sb:Co:S are 1.05:1.03:1.07:4.05 for **3**, consistent with the stoichiometry.

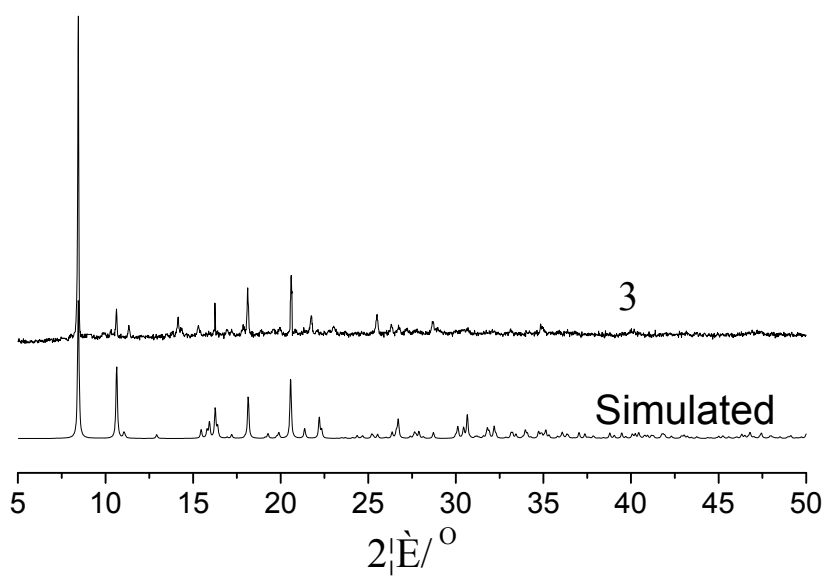

Figure S6 Simulated and experimental powder XRD patterns of **3** (The simulated XRD pattern is slightly different from the measured one. It means that **3** is sensible to the moisture and air).
